# Supplementary material for: Fe3O4–Pd Janus nanoparticles with amplified dual-mode hyperthermia and enhanced ROS generation for breast cancer treatment
Source: Royal Society of Chemistry journal article supplement (doi:10.1039/c9nh00233b), 2019-01-01
Supplement: c9nh00233b1.pdf [file c9nh00233b1.pdf]

## Supporting Information

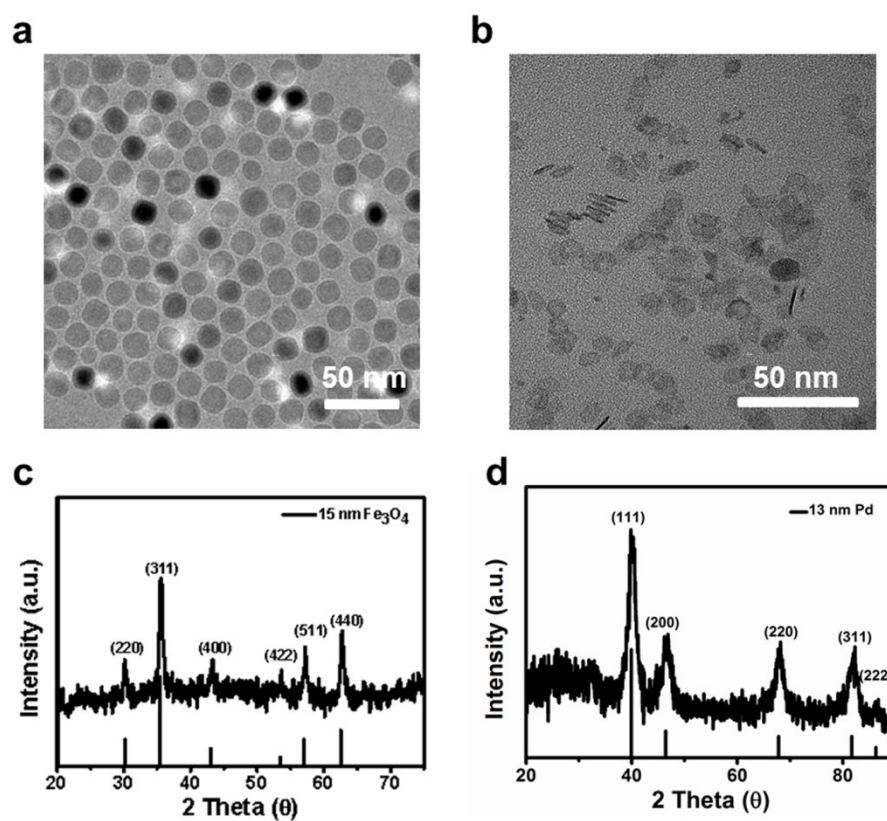

**Fig. S1** TEM images of (a) Fe<sub>3</sub>O<sub>4</sub> NPs and (b) Pd NSs. XRD patterns of (c) Fe<sub>3</sub>O<sub>4</sub> NPs and (d) Pd NSs.

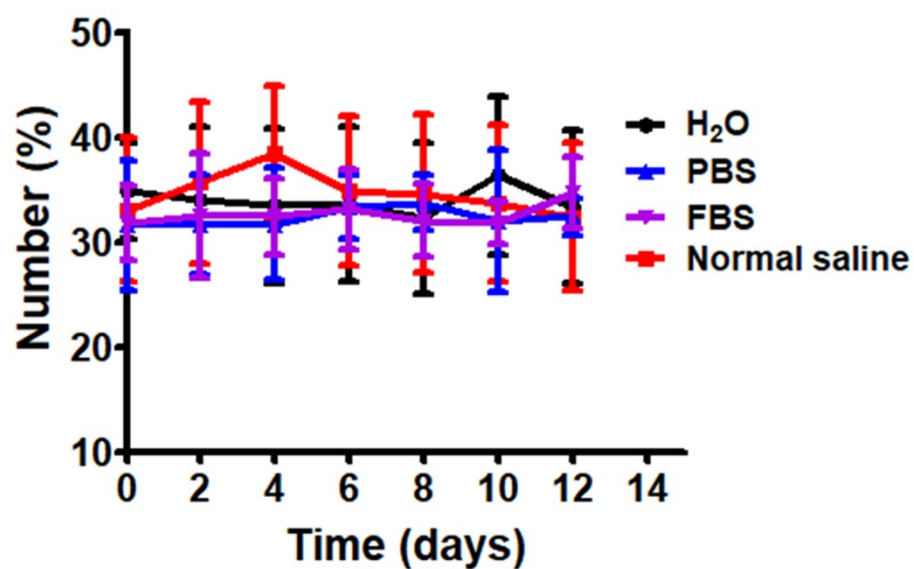

**Fig. S2** Hydrodynamic size variation of Fe<sub>3</sub>O<sub>4</sub>-Pd JNPs as a function of time upon incubation in DI water, 10% FBS, PBS, and normal saline.

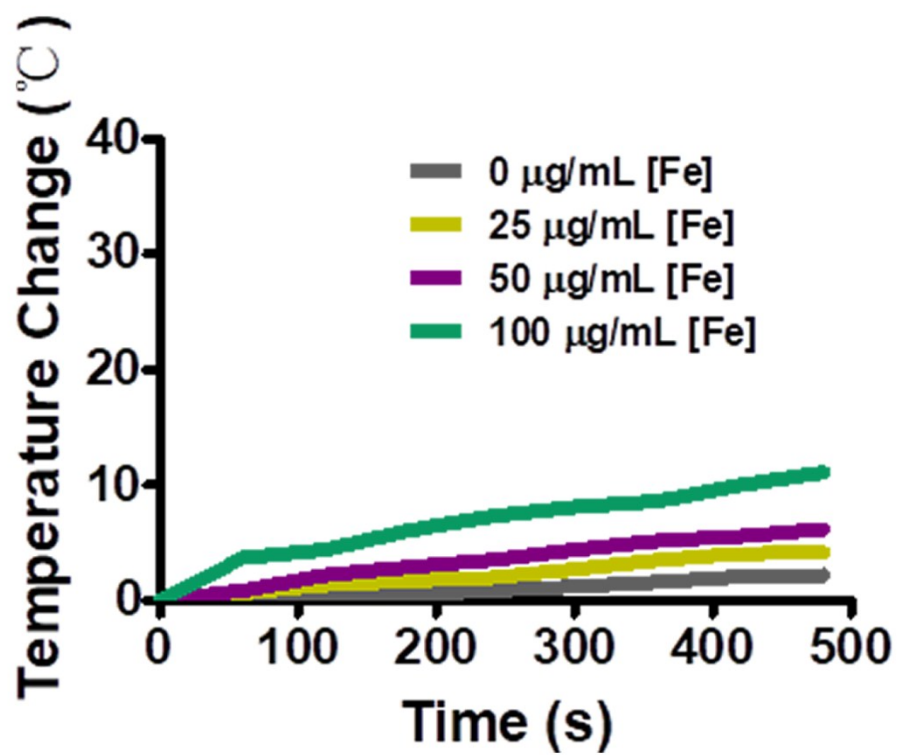

**Fig. S3** Time dependent heating profiles of Fe<sub>3</sub>O<sub>4</sub> NPs at various concentrations under AMF plus 808 nm laser irradiation.

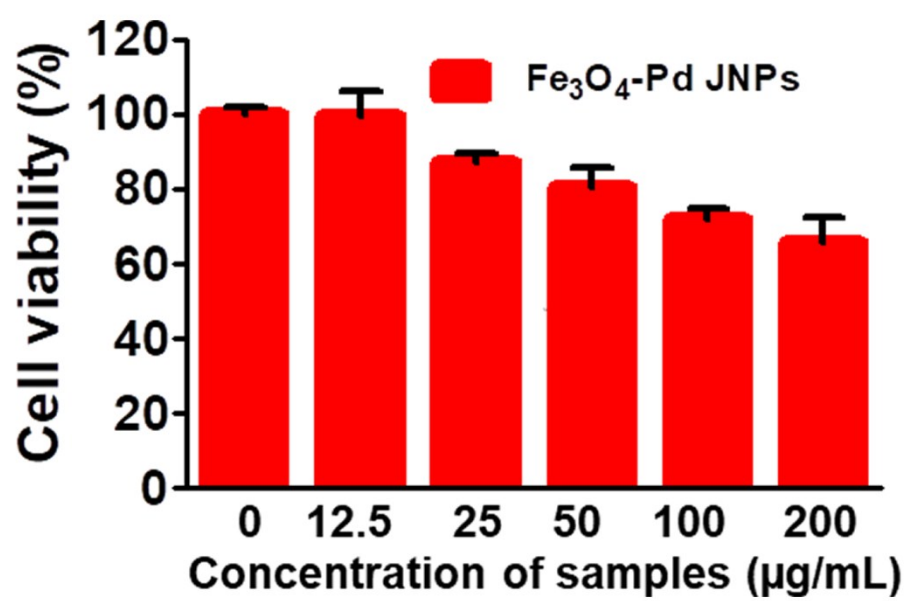

**Fig. S4** Cytotoxicity evaluation of Fe<sub>3</sub>O<sub>4</sub>-Pd JNPs.

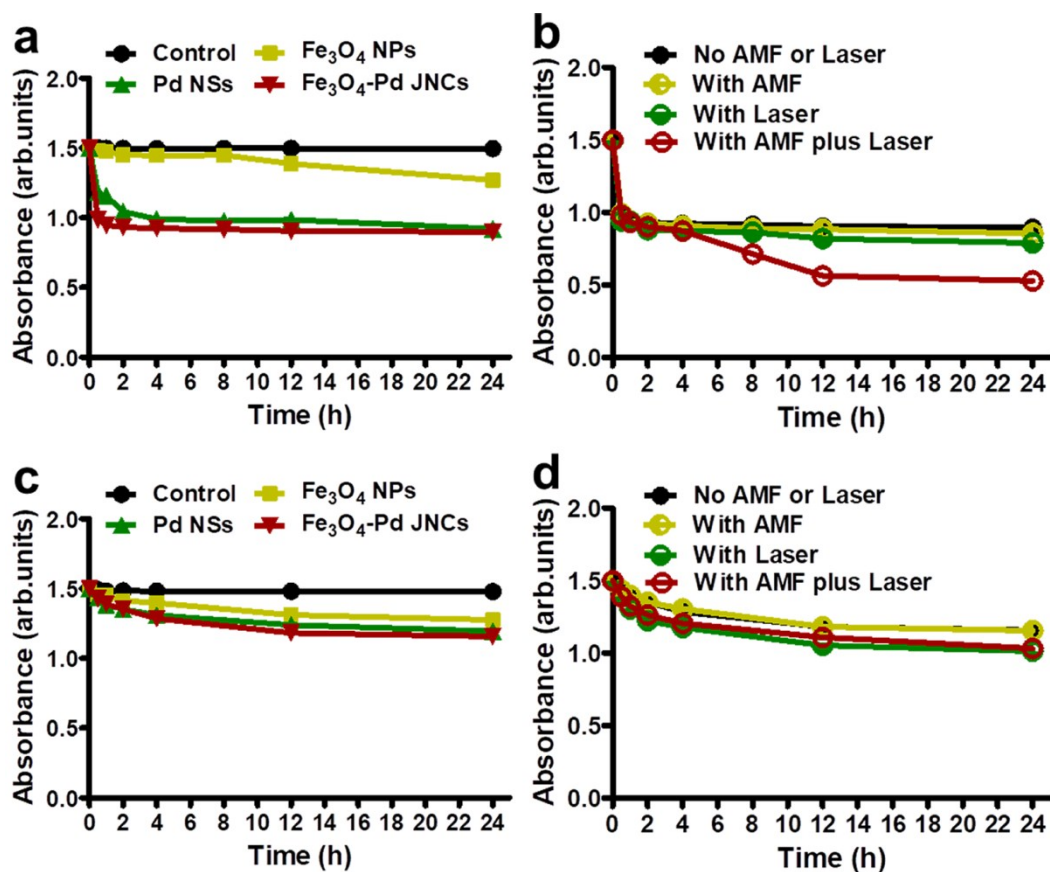

**Fig. S5** a) Decay curves of MB absorption at 664 nm in different solutions as a function of time at pH 6.5. b) Decay curves of MB absorption at 664 nm for  $\text{Fe}_3\text{O}_4$ -Pd JNPs under AMF or laser or both for 8 min, as a function of time, at pH 6.5. c) Decay curves of MB absorption at 664 nm in different solutions as a function of time at pH 7.4. d) Decay curves of MB absorption at 664 nm for  $\text{Fe}_3\text{O}_4$ -Pd JNPs under AMF or laser or both for 8 min, as a function of time, at pH 7.4.

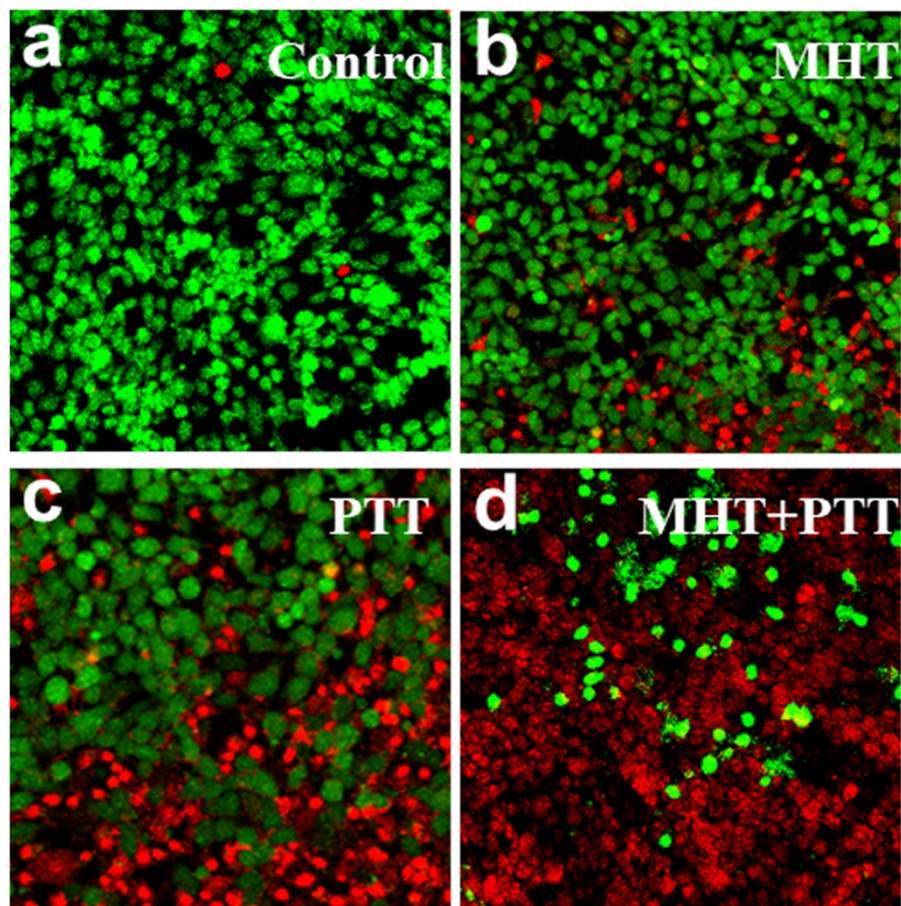

**Fig. S6** Confocal images of 4T1 cells after different treatment. The cells were stained with acridine orange/ethidium bromide for 1 min. Live and dead cells appear green and orange, respectively.

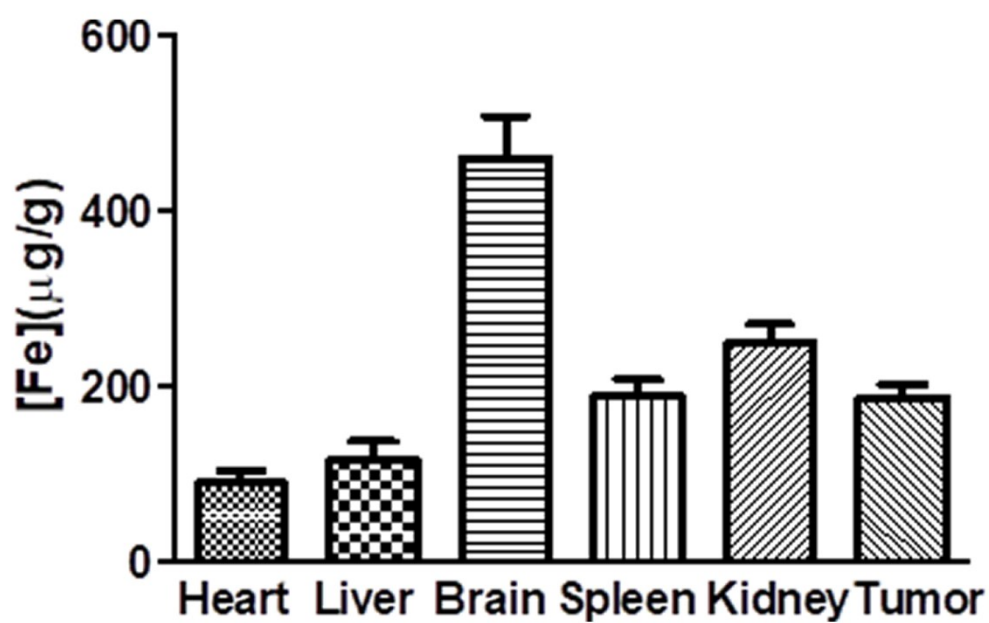

**Fig. S7** Biodistribution and tumor uptake of Fe<sub>3</sub>O<sub>4</sub>-Pd JNPs in 4T1 tumor-bearing mice. Data are expressed as means  $\pm$  s.d. (n = 3).



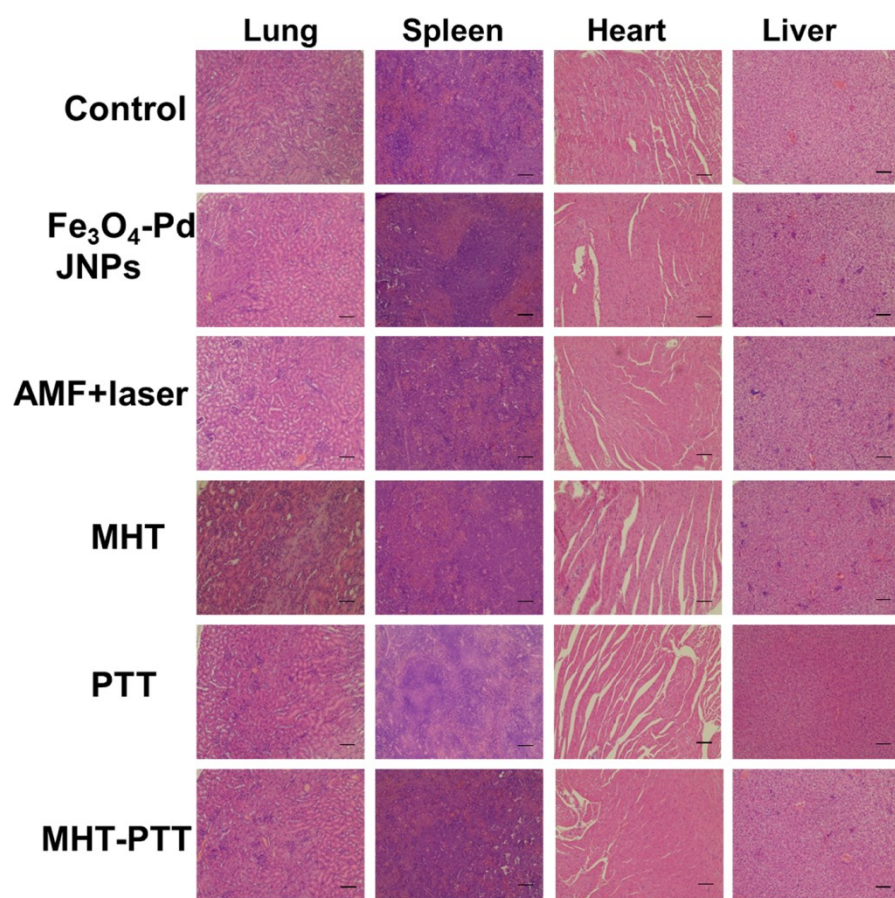

**Fig. S8** H&E staining of mice organs collected from different groups.



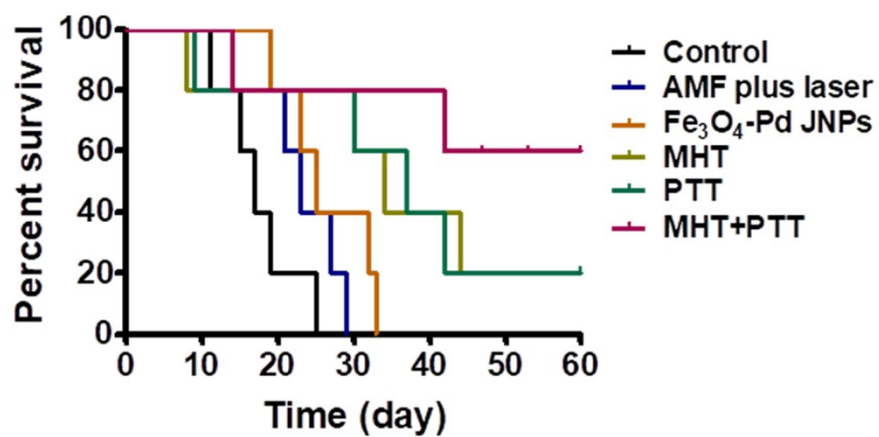

**Fig. S9** Survival rate of mouse of different groups after various treatments.
